# Supplementary material for: Through the patients’ eyes - Psychometric evaluation of the 64-item version of the Experienced Patient-Centeredness Questionnaire (EPAT-64)
Source: bioRxiv or medRxiv preprint supplement (doi:10.1101/2024.03.28.24304955), 2024-07-31
Supplement: Supplementary file [file media-3.pdf]

### Appendix 3: Sample characteristics per disease group

**Article:** Through the patients' eyes - Psychometric evaluation of the Experienced Patient-Centeredness Questionnaire (EPAT-64)

**Authors:** Eva Christalle, Stefan Zeh, Hannah Führes, Alica Schellhorn, Pola Hahlweg, Jödis Zill, Martin Härter, Carsten Bokemeyer, Jürgen Gallinat, Christoffer Gebhardt, Christina Magnussen, Volkmar Müller, Katharina Schmalstieg-Bahr, André Strahl, Levente Kriston, Isabelle Scholl

Table 1: Sample sizes per subgroup

| Disease group   | Outpatients |        |       | Inpatients |        |       |
|-----------------|-------------|--------|-------|------------|--------|-------|
|                 | Paper       | Online | Total | Paper      | Online | Total |
| Cardiovascular  | 269         | 8      | 277   | 260        | 26     | 286   |
| Cancer          | 282         | 14     | 296   | 318        | 33     | 351   |
| Musculoskeletal | 116         | 101    | 218   | 29         | 63     | 92    |
| Mental          | 192         | 80     | 272   | 77         | 125    | 202   |
| Total           | 889         | 203    | 1092  | 684        | 247    | 931   |

Table 2: Sample characteristics per subgroup - outpatient sample

| Characteristics                                        | Total                | Cardiovascular diseases | Cancer               | Musculoskeletal diseases | Mental disorders     |
|--------------------------------------------------------|----------------------|-------------------------|----------------------|--------------------------|----------------------|
| <b>Sample size</b>                                     | n = 1092             | n = 277                 | n = 296              | n = 218                  | n = 272              |
| <b>Age (in years)</b>                                  | M = 53.1 (SD = 17.5) | M = 60.1 (SD = 17.8)    | M = 59.2 (SD = 15.0) | M = 50.4 (SD = 15.7)     | M = 42.6 (SD = 14.8) |
| <b>Years since diagnosis</b>                           | M = 11.4 (SD = 12.0) | M = 14.8 (SD = 13.5)    | M = 5.8 (SD = 6.5)   | M = 13.5 (SD = 13.9)     | M = 12.6 (SD = 11.7) |
| <b>Years as patient in this outpatient clinic</b>      | M = 4.53 (SD = 6.5)  | M = 6.5 (SD = 9.4)      | M = 2.7 (SD = 4.6)   | M = 5.1 (SD = 6.5)       | M = 3.6 (SD = 4.3)   |
| <b>Health literacy<sup>a</sup></b>                     | M = 50.7 (SD = 7.7)  | M = 56.9 (SD = 7.5)     | M = 50.8 (SD = 7.6)  | M = 51.5 (SD = 7.3)      | M = 50.0 (SD = 7.9)  |
| <b>Satisfaction<sup>b</sup></b>                        | M = 27.5 (SD = 4.6)  | M = 28.1 (SD = 3.9)     | M = 28.3 (SD = 3.8)  | M = 26.3 (SD = 5.6)      | M = 26.9 (SD = 4.8)  |
| <b>Health status<sup>c</sup></b>                       | M = 3.4 (SD = 2.8)   | M = 3.1 (SD = 0.9)      | M = 3.1 (SD = 0.8)   | M = 3.4 (SD = 0.9)       | M = 3.8 (SD = 5.3)   |
| <b>Comorbidity (Do you have any further diseases?)</b> | n = 551 (55.0%)      | n = 135 (55.3%)         | n = 116 (46.0%)      | n = 154 (75.1%)          | n = 125 (48.8%)      |
| <b>Gender</b>                                          |                      |                         |                      |                          |                      |
| Female                                                 | n = 646 (60.3%)      | n = 127 (46.4%)         | n = 135 (50.9%)      | n = 161 (76.3%)          | n = 189 (69.7%)      |
| Male                                                   | n = 420 (39.2%)      | n = 147 (53.6%)         | n = 129 (48.7%)      | n = 48 (22.7%)           | n = 80 (29.5%)       |
| Diverse                                                | n = 5 (0.5%)         | n = 0 (0%)              | n = 1 (0.4%)         | n = 2 (0.9%)             | n = 2 (0.7%)         |
| <b>Marital status</b>                                  |                      |                         |                      |                          |                      |
| Unmarried/unpartnered                                  | n = 343 (32.3%)      | n = 57 (20,8%)          | n = 50 (19,0%)       | n = 65 (31,0%)           | n = 153 (57,7%)      |
| Married/partnered                                      | n = 552 (51.9%)      | n = 169 (61,7%)         | n = 173 (65,8%)      | n = 117 (55,7%)          | n = 71 (26,8%)       |
| Divorced                                               | n = 107 (10.1%)      | n = 25 (9,1%)           | n = 22 (8,4%)        | n = 20 (9,5%)            | n = 34 (12,8%)       |
| Widowed                                                | n = 61 (5.7%)        | n = 23 (8,4%)           | n = 18 (6,8%)        | n = 8 (3,8%)             | n = 7 (2,6%)         |
| <b>Formal education</b>                                |                      |                         |                      |                          |                      |
| Low <sup>d</sup>                                       | n = 10 (0.9%)        | n = 33 (12.0%)          | n = 46 (17.6%)       | n = 16 (7.6%)            | n = 21 (7.8%)        |
| Intermediate <sup>e</sup>                              | n = 404 (37.8%)      | n = 89 (32.4)           | n = 67 (25.6%)       | n = 58 (27.5%)           | n = 61 (22.6%)       |
| High <sup>f</sup>                                      | n = 267 (25.0%)      | n = 56 (20.4%)          | n = 57 (21.8%)       | n = 50 (23.7%)           | n = 92 (34.0%)       |
| Very high <sup>g</sup>                                 | n = 376 (35.2%)      | n = 93 (33.8%)          | n = 90 (34.3%)       | n = 84 (39.8%)           | n = 93 (34.3%)       |
| <b>Occupational status*</b>                            |                      |                         |                      |                          |                      |
| Employed                                               | n = 447 (41.9%)      | n = 96 (35.3%)          | n = 110 (41.7%)      | n = 110 (52.1%)          | n = 106 (39.6%)      |
| Unemployed                                             | n = 66 (6.2%)        | n = 5 (1.8%)            | n = 14 (5.3%)        | n = 7 (3.3%)             | n = 39 (14.6%)       |

|                                                                                              |                 |                 |                 |                 |                 |
|----------------------------------------------------------------------------------------------|-----------------|-----------------|-----------------|-----------------|-----------------|
| Student/trainee                                                                              | n = 91 (8.5%)   | n = 15 (5.5%)   | n = 7 (2.7%)    | n = 19 (9.0%)   | n = 45 (16.5%)  |
| Parental leave                                                                               | n = 48 (4.5%)   | n = 2 (0.7%)    | n = 1 (0.4%)    | n = 4 (1.8%)    | n = 2 (0.7%)    |
| Retired                                                                                      | n = 394 (37.0%) | n = 130 (47.8%) | n = 115 (43.6%) | n = 69 (32.7%)  | n = 60 (22.4%)  |
| <b>Health insurance*</b>                                                                     |                 |                 |                 |                 |                 |
| Statutory                                                                                    | n = 910 (83.7%) | n = 211 (76.2%) | n = 216 (79.1%) | n = 190 (89.2%) | n = 246 (90.1%) |
| Private                                                                                      | n = 164 (15.1%) | n = 73 (26.4%)  | n = 42 (15.4%)  | n = 21 (9.9%)   | n = 24 (8.8%)   |
| <b>Migration background</b> (Were you or your parents born in another country than Germany?) | n = 167 (15.7%) | n = 24 (8.8%)   | n = 37 (14.0%)  | n = 43 (19.8%)  | n = 54 (20.1%)  |
| <b>Reason for visit in outpatient clinic*</b>                                                |                 |                 |                 |                 |                 |
| Acute symptoms/emergency                                                                     | n = 219 (23.4%) | n = 20 (13.9%)  | n = 22 (8.4%)   | n = 71 (33.6%)  | n = 93 (34.6%)  |
| Treatment planning                                                                           | n = 246 (26.3%) | n = 33 (22.9%)  | n = 80 (30.4%)  | n = 51 (24.2%)  | n = 72 (26.8%)  |
| First appointment                                                                            | n = 196 (20.9%) | n = 18 (12.5%)  | n = 66 (25.1%)  | n = 29 (13.4%)  | n = 73 (27.1)   |
| Carrying out treatment                                                                       | n = 373 (39.8%) | n = 30 (20.8%)  | n = 141 (53.6%) | n = 85 (40.3%)  | n = 101 (37.5%) |
| Diagnostics/examination                                                                      | n = 284 (30.3%) | n = 64 (44.4%)  | n = 94 (35.7%)  | n = 59 (28.0%)  | n = 50 (18.6%)  |
| Progress discussion during treatment                                                         | n = 241 (25.7%) | n = 15 (10.4%)  | n = 96 (36.5%)  | n = 60 (28.4%)  | n = 58 (21.6%)  |
| Discussion of examination results                                                            | n = 209 (22.3%) | n = 33 (22.9%)  | n = 100 (38.0%) | n = 40 (19.0%)  | n = 19 (7.1%)   |
| Follow-up                                                                                    | n = 301 (32.1%) | n = 79 (54.9%)  | n = 92 (35%)    | n = 65 (30.8%)  | n = 48 (17.8%)  |

**Note:** \* multiple answers possible, M = Mean, SD = Standard Deviation, <sup>a</sup> Health literacy measured by HLS-EU-Q16(1), range 0-64, high value=high health literacy, <sup>b</sup> Treatment satisfaction measured by ZUF-8(2), range 8-32, high value=high satisfaction, <sup>c</sup> General health status measured by first item of SF-12(3), range 0-5, high value=low health status, <sup>d</sup> low = no formal degree or graduation after less than 10 years at school; <sup>e</sup> intermediate = graduation after 10 years at school; <sup>f</sup> high = graduation after more than 10 years at school; <sup>g</sup> very high = college or university degree

Table 3: Sample characteristics per subgroup - inpatient sample

| Characteristics                                        | Total                | Cardiovascular diseases | Cancer               | Musculoskeletal diseases | Mental disorders     |
|--------------------------------------------------------|----------------------|-------------------------|----------------------|--------------------------|----------------------|
| <b>Sample size</b>                                     | n = 921              | n = 286                 | n = 351              | n = 92                   | n = 202              |
| <b>Age</b> (in years)                                  | M = 56.0 (SD = 17.6) | M = 64.5 (SD = 14.0)    | M = 60.9 (SD = 13.5) | M = 52.5 (SD = 16.4)     | M = 37.0 (SD = 14.2) |
| <b>Years since diagnosis</b>                           | M = 8.5 (SD = 10.0)  | M = 12.0 (SD = 11.3)    | M = 3.7 (SD = 5.6)   | M = 12.0 (SD = 12.4)     | M = 9.9 (SD = 9.4)   |
| <b>Length of stay</b> (in days)                        | M = 18.1 (SD = 30.6) | M = 7.0 (SD = 5.2)      | M = 10.3 (SD = 11.4) | M = 16.9 (SD = 59.2)     | M = 47.3 (SD = 37.2) |
| <b>Health literacy<sup>a</sup></b>                     | M = 50.6 (SD = 7.7)  | M = 46.5 (SD = 9.0)     | M = 51.8 (SD = 7.4)  | M = 50.2 (SD = 8.5)      | M = 49.5 (SD = 7.3)  |
| <b>Satisfaction<sup>b</sup></b>                        | M = 28.0 (SD = 4.9)  | M = 28.8 (SD = 4.0)     | M = 29.7 (SD = 3.3)  | M = 26.1 (SD = 5.6)      | M = 24.7 (SD = 6.1)  |
| <b>Health status<sup>c</sup></b>                       | M = 3.4 (SD = 4.1)   | M = 3.1 (SD = 0.8)      | M = 3.1 (SD = 0.8)   | M = 4.3 (SD = 9.0)       | M = 4.0 (SD = 6.1)   |
| <b>Comorbidity</b> (Do you have any further diseases?) | n = 467 (54.3%)      | n = 130 (50.8%)         | n = 159 (50.6%)      | n = 62 (68.9%)           | n = 107 (56.3%)      |
| <b>Gender</b>                                          |                      |                         |                      |                          |                      |
| Female                                                 | n = 384 (42.3%)      | n = 105 (37.6%)         | n = 93 (27.6%)       | n = 57 (62.6%)           | n = 124 (65.3%)      |
| Male                                                   | n = 517 (57.0%)      | n = 174 (62.4%)         | n = 244 (72.4%)      | n = 32 (35.2%)           | n = 62 (32.6%)       |
| Diverse                                                | n = 6 (0.7%)         | n = 0 (0%)              | n = 0 (0%)           | n = 2 (2.2%)             | n = 4 (2.1%)         |
| <b>Marital status</b>                                  |                      |                         |                      |                          |                      |
| Unmarried/unpartnered                                  | n = 237 (26.5%)      | n = 27 (9.8%)           | n = 49 (14.6%)       | n = 27 (30.7%)           | n = 132 (70.6%)      |
| Married/partnered                                      | n = 524 (58.5%)      | n = 187 (68.0%)         | n = 239 (71.3%)      | n = 53 (60.2%)           | n = 42 (22.5%)       |
| Divorced                                               | n = 80 (8.9%)        | n = 30 (10.9%)          | n = 27 (8.1%)        | n = 7 (8.0%)             | n = 12 (6.4%)        |
| Widowed                                                | n = 54 (6%)          | n = 31 (11.3%)          | n = 20 (6.0%)        | n = 1 (1.1%)             | n = 1 (0.5%)         |
| <b>Formal education</b>                                |                      |                         |                      |                          |                      |
| Low <sup>d</sup>                                       | n = 20 (2.2%)        | n = 68 (24,5%)          | n = 57 (17,0%)       | n = 35 (39,3%)           | n = 23 (11,9%)       |
| Intermediate <sup>e</sup>                              | n = 383 (42.3%)      | n = 82 (29,5%)          | n = 75 (22,4%)       | n = 6 (6,7%)             | n = 57 (29,5%)       |
| High <sup>f</sup>                                      | n = 204 (22.6%)      | n = 46 (16,5%)          | n = 64 (19,1%)       | n = 47 (52,8%)           | n = 73 (37,8%)       |
| Very high <sup>g</sup>                                 | n = 279 (30.9%)      | n = 75 (27,0%)          | n = 131 (39,1%)      | n = 1 (1,1%)             | n = 38 (19,7%)       |
| <b>Occupational status*</b>                            |                      |                         |                      |                          |                      |
| Employed                                               | n = 357 (39.1%)      | n = 98 (34.9%)          | n = 143 (42.6%)      | n = 38 (41.8%)           | n = 76 (38.8%)       |
| Unemployed                                             | n = 64 (7.0%)        | n = 11 (3.9%)           | n = 8 (2.4%)         | n = 4 (4.3%)             | n = 41 (20.9%)       |

|                                                                                              |                 |                 |                 |                |                 |
|----------------------------------------------------------------------------------------------|-----------------|-----------------|-----------------|----------------|-----------------|
| Student/trainee                                                                              | n = 50 (5.5%)   | n = 3 (1.1%)    | n = 7 (2.1%)    | n = 7 (7.7%)   | n = 33 (16.8%)  |
| Parental leave                                                                               | n = 7 (0.8%)    | n = 0 (0%)      | n = 2 (0.6%)    | n = 3 (3.3%)   | n = 2 (1%)      |
| Retired                                                                                      | n = 392 (42.9%) | n = 152 (54.1%) | n = 166 (49.4%) | n = 35 (38.5%) | n = 31 (15.8%)  |
| <b>Health insurance*</b>                                                                     |                 |                 |                 |                |                 |
| Statutory                                                                                    | n = 721 (78.1%) | n = 223 (78.2%) | n = 226 (66.3%) | n = 78 (85.7%) | n = 184 (93.4%) |
| Private                                                                                      | n = 214 (23.2%) | n = 65 (22.8%)  | n = 121 (35.6%) | n = 14 (15.2%) | n = 14 (7.1%)   |
| <b>Migration background</b> (Were you or your parents born in another country than Germany?) | n = 150 (16.5%) | n = 31 (11.1%)  | n = 50 (14.7%)  | n = 13 (14.1%) | n = 55 (28.5%)  |

**Note:** \* multiple answers possible, M = Mean, SD = Standard Deviation, <sup>a</sup> Health literacy measured by HLS-EU-Q16(1), range 0-64, high value=high health literacy, <sup>b</sup> Treatment satisfaction measured by ZUF-8(2), range 8-32, high value=high satisfaction, <sup>c</sup> General health status measured by first item of SF-12(3), range 0-5, high value=low health status, <sup>d</sup> low = no formal degree or graduation after less than 10 years at school; <sup>e</sup> intermediate = graduation after 10 years at school; <sup>f</sup> high = graduation after more than 10 years at school; <sup>g</sup> very high = college or university degree

## References

1. Jordan S, Hoebel J. Health literacy of adults in Germany: Findings from the German Health Update (GEDA) study. Bundesgesundheitsblatt-Gesundheitsforschung-Gesundheitsschutz. 2015;58:942-50.
2. Kriz D, Nübling R, Steffanowski A, Wittmann WW, Schmidt J. Patientenzufriedenheit in der stationären Rehabilitation: Psychometrische Reanalyse des ZUF-8 auf der Basis multizentrischer Stichproben verschiedener Indikation. Zeitschrift für medizinische Psychologie. 2008;17(2-3):67-79.
3. Wirtz MA, Morfeld M, Glaesmer H, Brähler E. Konfirmatorische Prüfung der Skalenstruktur des SF-12 Version 2.0 in einer deutschen bevölkerungs-repräsentativen Stichprobe. Diagnostica. 2018;64(2):84-96.
