# Supplementary material for: Through the patients’ eyes - Psychometric evaluation of the 64-item version of the Experienced Patient-Centeredness Questionnaire (EPAT-64)
Source: bioRxiv or medRxiv preprint supplement (doi:10.1101/2024.03.28.24304955), 2024-07-31
Supplement: Supplementary file [file media-6.pdf]

## Appendix 6: Correlations between specific dimensions

**Article:** Through the patients' eyes - Psychometric evaluation of the Experienced Patient-Centeredness Questionnaire (EPAT-64)

**Authors:** Eva Christalle, Stefan Zeh, Hannah Führes, Alica Schellhorn, Pola Hahlweg, Jördis Zill, Martin Härter, Carsten Bokemeyer, Jürgen Gallinat, Christoffer Gebhardt, Christina Magnussen, Volkmar Müller, Katharina Schmalstieg-Bahr, André Strahl, Levente Kriston, Isabelle Scholl

**Table 1:** Correlations between specific dimensions estimated based on confirmatory factor analysis - outpatient sample

|                                             | Patient as a unique person | Patient involvement in care | Physical support | Patient empowerment | Clinician-patient communication | Patient safety | Patient information | Involvement of family and friends | Teamwork and teambuilding | Clinician-patient relationship | Biopsychosocial perspective | Emotional support | Coordination and continuity of care | Essential characteristics of the clinicians | Access to care | Integration of medical and non-medical care |
|---------------------------------------------|----------------------------|-----------------------------|------------------|---------------------|---------------------------------|----------------|---------------------|-----------------------------------|---------------------------|--------------------------------|-----------------------------|-------------------|-------------------------------------|---------------------------------------------|----------------|---------------------------------------------|
| Patient as a unique person                  | 1.000                      | 0.703                       | 0.278            | 0.824               | 0.627                           | 0.734          | 0.643               | 0.604                             | 0.279                     | 0.580                          | 0.800                       | 0.712             | 0.700                               | 0.661                                       | 0.136          | 0.630                                       |
| Patient involvement in care                 | 0.703                      | 1.000                       | 0.341            | 0.672               | 0.447                           | 0.527          | 0.509               | 0.520                             | 0.191                     | 0.416                          | 0.604                       | 0.522             | 0.580                               | 0.426                                       | 0.150          | 0.521                                       |
| Physical support                            | 0.278                      | 0.341                       | 1.000            | 0.450               | 0.228                           | 0.415          | 0.258               | 0.457                             | 0.304                     | 0.323                          | 0.323                       | 0.258             | 0.344                               | 0.364                                       | 0.281          | 0.361                                       |
| Patient empowerment                         | 0.824                      | 0.672                       | 0.450            | 1.000               | 0.658                           | 0.765          | 0.725               | 0.691                             | 0.370                     | 0.580                          | 0.736                       | 0.645             | 0.780                               | 0.647                                       | 0.226          | 0.724                                       |
| Clinician-patient communication             | 0.627                      | 0.447                       | 0.228            | 0.658               | 1.000                           | 0.605          | 0.443               | 0.478                             | 0.235                     | 0.453                          | 0.566                       | 0.559             | 0.602                               | 0.471                                       | 0.269          | 0.528                                       |
| Patient safety                              | 0.734                      | 0.527                       | 0.415            | 0.765               | 0.605                           | 1.000          | 0.676               | 0.708                             | 0.370                     | 0.476                          | 0.710                       | 0.524             | 0.782                               | 0.579                                       | 0.256          | 0.625                                       |
| Patient information                         | 0.643                      | 0.509                       | 0.258            | 0.725               | 0.443                           | 0.676          | 1.000               | 0.614                             | 0.353                     | 0.494                          | 0.619                       | 0.436             | 0.750                               | 0.515                                       | 0.214          | 0.522                                       |
| Involvement of family and friends           | 0.604                      | 0.520                       | 0.457            | 0.691               | 0.478                           | 0.708          | 0.614               | 1.000                             | 0.416                     | 0.528                          | 0.599                       | 0.489             | 0.710                               | 0.525                                       | 0.302          | 0.596                                       |
| Teamwork and teambuilding                   | 0.279                      | 0.191                       | 0.304            | 0.370               | 0.235                           | 0.370          | 0.353               | 0.416                             | 1.000                     | 0.260                          | 0.299                       | 0.224             | 0.605                               | 0.236                                       | 0.517          | 0.336                                       |
| Clinician-patient relationship              | 0.580                      | 0.416                       | 0.323            | 0.580               | 0.453                           | 0.476          | 0.494               | 0.528                             | 0.260                     | 1.000                          | 0.564                       | 0.586             | 0.445                               | 0.660                                       | 0.040          | 0.487                                       |
| Biopsychosocial perspective                 | 0.800                      | 0.604                       | 0.323            | 0.736               | 0.566                           | 0.710          | 0.619               | 0.599                             | 0.299                     | 0.564                          | 1.000                       | 0.776             | 0.714                               | 0.629                                       | 0.123          | 0.653                                       |
| Emotional support                           | 0.712                      | 0.522                       | 0.258            | 0.645               | 0.559                           | 0.524          | 0.436               | 0.489                             | 0.224                     | 0.586                          | 0.776                       | 1.000             | 0.606                               | 0.697                                       | 0.109          | 0.622                                       |
| Coordination and continuity of care         | 0.700                      | 0.580                       | 0.344            | 0.780               | 0.602                           | 0.782          | 0.750               | 0.710                             | 0.605                     | 0.445                          | 0.714                       | 0.606             | 1.000                               | 0.568                                       | 0.489          | 0.636                                       |
| Essential characteristics of the clinicians | 0.661                      | 0.426                       | 0.364            | 0.647               | 0.471                           | 0.579          | 0.515               | 0.525                             | 0.236                     | 0.660                          | 0.629                       | 0.697             | 0.568                               | 1.000                                       | 0.146          | 0.551                                       |
| Access to care                              | 0.136                      | 0.150                       | 0.281            | 0.226               | 0.269                           | 0.256          | 0.214               | 0.302                             | 0.517                     | 0.040                          | 0.123                       | 0.109             | 0.489                               | 0.146                                       | 1.000          | 0.239                                       |
| Integration of medical and non-medical care | 0.630                      | 0.521                       | 0.361            | 0.724               | 0.528                           | 0.625          | 0.522               | 0.596                             | 0.336                     | 0.487                          | 0.653                       | 0.622             | 0.636                               | 0.551                                       | 0.239          | 1.000                                       |

**Table 2:** Correlations between specific dimensions estimated based on confirmatory factor analysis - inpatient sample

|                                             | Patient as a unique person | Patient involvement in care | Physical support | Patient empowerment | Clinician-patient communication | Patient safety | Patient information | Involvement of family and friends | Teamwork and teambuilding | Clinician-patient relationship | Biopsychosocial perspective | Emotional support | Coordination and continuity of care | Essential characteristics of the clinicians | Access to care | Integration of medical and non-medical care |
|---------------------------------------------|----------------------------|-----------------------------|------------------|---------------------|---------------------------------|----------------|---------------------|-----------------------------------|---------------------------|--------------------------------|-----------------------------|-------------------|-------------------------------------|---------------------------------------------|----------------|---------------------------------------------|
| Patient as a unique person                  | 1.000                      | 0.648                       | 0.098            | 0.773               | 0.545                           | 0.707          | 0.589               | 0.610                             | 0.236                     | 0.614                          | 0.813                       | 0.664             | 0.655                               | 0.596                                       | -0.041         | 0.655                                       |
| Patient involvement in care                 | 0.648                      | 1.000                       | 0.019            | 0.505               | 0.364                           | 0.488          | 0.470               | 0.478                             | 0.107                     | 0.420                          | 0.525                       | 0.435             | 0.523                               | 0.383                                       | -0.021         | 0.508                                       |
| Physical support                            | 0.098                      | 0.019                       | 1.000            | 0.094               | -0.045                          | 0.118          | 0.036               | 0.107                             | 0.063                     | -0.046                         | 0.060                       | 0.073             | 0.040                               | 0.054                                       | 0.231          | 0.137                                       |
| Patient empowerment                         | 0.773                      | 0.505                       | 0.094            | 1.000               | 0.456                           | 0.735          | 0.595               | 0.582                             | 0.308                     | 0.518                          | 0.694                       | 0.595             | 0.650                               | 0.525                                       | -0.003         | 0.645                                       |
| Clinician-patient communication             | 0.545                      | 0.364                       | -0.045           | 0.456               | 1.000                           | 0.384          | 0.345               | 0.288                             | 0.169                     | 0.465                          | 0.478                       | 0.490             | 0.329                               | 0.265                                       | -0.070         | 0.353                                       |
| Patient safety                              | 0.707                      | 0.488                       | 0.118            | 0.735               | 0.384                           | 1.000          | 0.594               | 0.631                             | 0.324                     | 0.415                          | 0.658                       | 0.482             | 0.697                               | 0.446                                       | 0.021          | 0.578                                       |
| Patient information                         | 0.589                      | 0.470                       | 0.036            | 0.595               | 0.345                           | 0.594          | 1.000               | 0.545                             | 0.314                     | 0.360                          | 0.600                       | 0.391             | 0.641                               | 0.300                                       | 0.004          | 0.421                                       |
| Involvement of family and friends           | 0.610                      | 0.478                       | 0.107            | 0.582               | 0.288                           | 0.631          | 0.545               | 1.000                             | 0.314                     | 0.369                          | 0.595                       | 0.482             | 0.678                               | 0.436                                       | 0.031          | 0.594                                       |
| Teamwork and teambuilding                   | 0.236                      | 0.107                       | 0.063            | 0.308               | 0.169                           | 0.324          | 0.314               | 0.314                             | 1.000                     | 0.204                          | 0.278                       | 0.235             | 0.363                               | 0.059                                       | -0.140         | 0.280                                       |
| Clinician-patient relationship              | 0.614                      | 0.420                       | -0.046           | 0.518               | 0.465                           | 0.415          | 0.360               | 0.369                             | 0.204                     | 1.000                          | 0.599                       | 0.667             | 0.427                               | 0.523                                       | -0.114         | 0.471                                       |
| Biopsychosocial perspective                 | 0.813                      | 0.525                       | 0.060            | 0.694               | 0.478                           | 0.658          | 0.600               | 0.595                             | 0.278                     | 0.599                          | 1.000                       | 0.744             | 0.740                               | 0.589                                       | 0.000          | 0.656                                       |
| Emotional support                           | 0.664                      | 0.435                       | 0.073            | 0.595               | 0.490                           | 0.482          | 0.391               | 0.482                             | 0.235                     | 0.667                          | 0.744                       | 1.000             | 0.621                               | 0.719                                       | 0.020          | 0.626                                       |
| Coordination and continuity of care         | 0.655                      | 0.523                       | 0.040            | 0.650               | 0.329                           | 0.697          | 0.641               | 0.678                             | 0.363                     | 0.427                          | 0.740                       | 0.621             | 1.000                               | 0.580                                       | 0.131          | 0.673                                       |
| Essential characteristics of the clinicians | 0.596                      | 0.383                       | 0.054            | 0.525               | 0.265                           | 0.446          | 0.300               | 0.436                             | 0.059                     | 0.523                          | 0.589                       | 0.719             | 0.580                               | 1.000                                       | -0.051         | 0.553                                       |
| Access to care                              | -0.041                     | -0.021                      | 0.231            | -0.003              | -0.070                          | 0.021          | 0.004               | 0.031                             | -0.140                    | -0.114                         | 0.000                       | 0.020             | 0.131                               | -0.051                                      | 1.000          | 0.085                                       |
| Integration of medical and non-medical care | 0.655                      | 0.508                       | 0.137            | 0.645               | 0.353                           | 0.578          | 0.421               | 0.594                             | 0.280                     | 0.471                          | 0.656                       | 0.626             | 0.673                               | 0.553                                       | 0.085          | 1.000                                       |
