# Supplementary material for: Through the patients’ eyes - Psychometric evaluation of the 64-item version of the Experienced Patient-Centeredness Questionnaire (EPAT-64)
Source: bioRxiv or medRxiv preprint supplement (doi:10.1101/2024.03.28.24304955), 2024-07-31
Supplement: Supplementary file [file media-7.pdf]

## Appendix 7: Correlations between sum scores and model-based factor scores

**Article:** Through the patients' eyes - Psychometric evaluation of the Experienced Patient-Centeredness Questionnaire (EPAT-64)

**Authors:** Eva Christalle, Stefan Zeh, Hannah Führes, Alica Schellhorn, Pola Hahlweg, Jördis Zill, Martin Härter, Carsten Bokemeyer, Jürgen Gallinat, Christoffer Gebhardt, Christina Magnussen, Volkmar Müller, Katharina Schmalstieg-Bahr, André Strahl, Levente Kriston, Isabelle Scholl

**Table 1:** Correlations between sum scores and model-based factor scores - outpatient sample

| Sum scores for specific dimensions          | Model-based factor scores | Essential characteristics of the clinicians | Clinician-patient relationship | Patient as a unique person | Biopsychosocial perspective | Clinician-patient communication | Integration of medical and non-medical | Teamwork and teambuilding | Access to care | Coordination and continuity of care | Patient safety | Patient information | Patient involvement in care | Involvement of family and friends | Patient empowerment | Physical support | Emotional support | General factor |
|---------------------------------------------|---------------------------|---------------------------------------------|--------------------------------|----------------------------|-----------------------------|---------------------------------|----------------------------------------|---------------------------|----------------|-------------------------------------|----------------|---------------------|-----------------------------|-----------------------------------|---------------------|------------------|-------------------|----------------|
| Essential characteristics of the clinicians |                           | <b>0.560</b>                                | 0.368                          | 0.324                      | 0.303                       | 0.267                           | 0.280                                  | 0.127                     | 0.085          | 0.289                               | 0.301          | 0.267               | 0.213                       | 0.274                             | 0.320               | 0.219            | 0.335             | 0.872          |
| Clinician-patient relationship              |                           | 0.428                                       | <b>0.588</b>                   | 0.360                      | 0.355                       | 0.314                           | 0.318                                  | 0.211                     | 0.070          | 0.321                               | 0.334          | 0.340               | 0.280                       | 0.353                             | 0.374               | 0.242            | 0.343             | 0.823          |
| Patient as a unique person                  |                           | 0.602                                       | 0.538                          | <b>0.802</b>               | 0.643                       | 0.577                           | 0.530                                  | 0.230                     | 0.106          | 0.580                               | 0.626          | 0.533               | 0.600                       | 0.509                             | 0.665               | 0.263            | 0.574             | 0.628          |
| Biopsychosocial perspective                 |                           | 0.636                                       | 0.558                          | 0.725                      | <b>0.895</b>                | 0.582                           | 0.606                                  | 0.277                     | 0.097          | 0.665                               | 0.682          | 0.594               | 0.563                       | 0.562                             | 0.671               | 0.338            | 0.684             | 0.423          |
| Clinician-patient communication             |                           | 0.296                                       | 0.289                          | 0.354                      | 0.315                       | <b>0.632</b>                    | 0.317                                  | 0.154                     | 0.167          | 0.348                               | 0.356          | 0.254               | 0.271                       | 0.283                             | 0.368               | 0.161            | 0.311             | 0.798          |
| Integration of medical and non-medical care |                           | 0.608                                       | 0.538                          | 0.622                      | 0.645                       | 0.609                           | <b>0.970</b>                           | 0.305                     | 0.207          | 0.629                               | 0.641          | 0.506               | 0.530                       | 0.597                             | 0.713               | 0.407            | 0.619             | 0.286          |
| Teamwork and teambuilding                   |                           | 0.172                                       | 0.204                          | 0.185                      | 0.195                       | 0.173                           | 0.227                                  | <b>0.730</b>              | 0.371          | 0.419                               | 0.249          | 0.248               | 0.139                       | 0.298                             | 0.243               | 0.232            | 0.149             | 0.609          |
| Access to care                              |                           | 0.175                                       | 0.049                          | 0.146                      | 0.135                       | 0.275                           | 0.227                                  | 0.491                     | <b>0.890</b>   | 0.449                               | 0.253          | 0.200               | 0.146                       | 0.284                             | 0.216               | 0.291            | 0.114             | 0.435          |
| Coordination and continuity of care         |                           | 0.408                                       | 0.315                          | 0.457                      | 0.467                       | 0.430                           | 0.423                                  | 0.440                     | 0.341          | <b>0.675</b>                        | 0.544          | 0.517               | 0.399                       | 0.492                             | 0.507               | 0.274            | 0.379             | 0.557          |
| Patient safety                              |                           | 0.513                                       | 0.420                          | 0.568                      | 0.551                       | 0.520                           | 0.521                                  | 0.323                     | 0.216          | 0.642                               | <b>0.820</b>   | 0.566               | 0.415                       | 0.592                             | 0.610               | 0.392            | 0.391             | 0.477          |
| Patient information                         |                           | 0.483                                       | 0.440                          | 0.522                      | 0.498                       | 0.406                           | 0.445                                  | 0.302                     | 0.177          | 0.631                               | 0.597          | <b>0.836</b>        | 0.429                       | 0.533                             | 0.594               | 0.253            | 0.339             | 0.560          |
| Patient involvement in care                 |                           | 0.379                                       | 0.358                          | 0.538                      | 0.463                       | 0.365                           | 0.412                                  | 0.149                     | 0.114          | 0.454                               | 0.435          | 0.416               | <b>0.757</b>                | 0.417                             | 0.516               | 0.313            | 0.375             | 0.681          |
| Involvement of family and friends           |                           | 0.604                                       | 0.583                          | 0.573                      | 0.562                       | 0.511                           | 0.601                                  | 0.389                     | 0.322          | 0.714                               | 0.720          | 0.644               | 0.514                       | <b>0.962</b>                      | 0.681               | 0.529            | 0.477             | 0.323          |
| Patient empowerment                         |                           | 0.673                                       | 0.595                          | 0.753                      | 0.691                       | 0.679                           | 0.688                                  | 0.366                     | 0.203          | 0.749                               | 0.755          | 0.700               | 0.629                       | 0.674                             | <b>0.909</b>        | 0.489            | 0.594             | 0.424          |
| Physical support                            |                           | 0.470                                       | 0.385                          | 0.402                      | 0.403                       | 0.328                           | 0.424                                  | 0.315                     | 0.263          | 0.444                               | 0.505          | 0.392               | 0.353                       | 0.516                             | 0.503               | <b>0.727</b>     | 0.340             | 0.673          |
| Emotional support                           |                           | 0.737                                       | 0.605                          | 0.670                      | 0.731                       | 0.602                           | 0.620                                  | 0.225                     | 0.111          | 0.596                               | 0.534          | 0.439               | 0.515                       | 0.496                             | 0.623               | 0.309            | <b>0.900</b>      | 0.480          |

**Table 2:** Correlations between sum scores and model-based factor scores - inpatient sample

| Sum scores for specific dimensions          | Essential characteristics of the clinicians | Clinician-patient relationship | Patient as a unique person | Biopsychosocial perspective | Clinician-patient communication | Integration of medical and non-medical | Teamwork and teambuilding | Access to care | Coordination and continuity of care | Patient safety | Patient information | Patient involvement in care | Involvement of family and friends | Patient empowerment | Physical support | Emotional support | General factor |
|---------------------------------------------|---------------------------------------------|--------------------------------|----------------------------|-----------------------------|---------------------------------|----------------------------------------|---------------------------|----------------|-------------------------------------|----------------|---------------------|-----------------------------|-----------------------------------|---------------------|------------------|-------------------|----------------|
| Essential characteristics of the clinicians | <b>0.427</b>                                | 0.204                          | 0.207                      | 0.203                       | 0.104                           | 0.203                                  | 0.016                     | -0.024         | 0.220                               | 0.161          | 0.103               | 0.139                       | 0.156                             | 0.189               | 0.020            | 0.256             | 0.884          |
| Clinician-patient relationship              | 0.356                                       | <b>0.654</b>                   | 0.380                      | 0.365                       | 0.334                           | 0.300                                  | 0.158                     | -0.070         | 0.286                               | 0.277          | 0.238               | 0.270                       | 0.240                             | 0.329               | -0.036           | 0.398             | 0.751          |
| Patient as a unique person                  | 0.529                                       | 0.536                          | <b>0.777</b>               | 0.624                       | 0.494                           | 0.527                                  | 0.209                     | -0.067         | 0.543                               | 0.580          | 0.477               | 0.531                       | 0.485                             | 0.617               | 0.083            | 0.514             | 0.614          |
| Biopsychosocial perspective                 | 0.631                                       | 0.613                          | 0.764                      | <b>0.923</b>                | 0.530                           | 0.631                                  | 0.291                     | -0.020         | 0.751                               | 0.658          | 0.600               | 0.514                       | 0.577                             | 0.670               | 0.041            | 0.687             | 0.324          |
| Clinician-patient communication             | 0.153                                       | 0.254                          | 0.278                      | 0.238                       | <b>0.588</b>                    | 0.185                                  | 0.095                     | -0.042         | 0.183                               | 0.209          | 0.189               | 0.197                       | 0.154                             | 0.241               | -0.026           | 0.244             | 0.825          |
| Integration of medical and non-medical care | 0.638                                       | 0.514                          | 0.636                      | 0.636                       | 0.395                           | <b>0.950</b>                           | 0.268                     | 0.082          | 0.697                               | 0.585          | 0.405               | 0.495                       | 0.562                             | 0.666               | 0.103            | 0.629             | 0.331          |
| Teamwork and teambuilding                   | 0.024                                       | 0.095                          | 0.108                      | 0.119                       | 0.096                           | 0.124                                  | <b>0.538</b>              | -0.084         | 0.177                               | 0.157          | 0.143               | 0.057                       | 0.163                             | 0.134               | 0.044            | 0.102             | 0.800          |
| Access to care                              | -0.013                                      | -0.061                         | 0.016                      | 0.038                       | 0.002                           | 0.088                                  | -0.035                    | <b>0.568</b>   | 0.130                               | 0.071          | 0.034               | 0.017                       | 0.065                             | 0.050               | 0.170            | 0.035             | 0.780          |
| Coordination and continuity of care         | 0.337                                       | 0.244                          | 0.328                      | 0.361                       | 0.198                           | 0.346                                  | 0.201                     | 0.071          | <b>0.529</b>                        | 0.359          | 0.338               | 0.273                       | 0.344                             | 0.331               | 0.015            | 0.309             | 0.783          |
| Patient safety                              | 0.345                                       | 0.287                          | 0.490                      | 0.455                       | 0.300                           | 0.411                                  | 0.254                     | 0.022          | 0.528                               | <b>0.737</b>   | 0.437               | 0.335                       | 0.461                             | 0.523               | 0.097            | 0.314             | 0.597          |
| Patient information                         | 0.249                                       | 0.284                          | 0.440                      | 0.443                       | 0.302                           | 0.319                                  | 0.273                     | 0.004          | 0.525                               | 0.473          | <b>0.791</b>        | 0.371                       | 0.431                             | 0.453               | 0.037            | 0.286             | 0.605          |
| Patient involvement in care                 | 0.320                                       | 0.328                          | 0.480                      | 0.381                       | 0.291                           | 0.390                                  | 0.086                     | -0.010         | 0.422                               | 0.394          | 0.378               | <b>0.753</b>                | 0.366                             | 0.383               | 0.019            | 0.307             | 0.663          |
| Involvement of family and friends           | 0.431                                       | 0.355                          | 0.524                      | 0.526                       | 0.310                           | 0.535                                  | 0.303                     | 0.024          | 0.659                               | 0.583          | 0.506               | 0.434                       | <b>0.908</b>                      | 0.512               | 0.123            | 0.424             | 0.385          |
| Patient empowerment                         | 0.552                                       | 0.526                          | 0.707                      | 0.648                       | 0.468                           | 0.598                                  | 0.309                     | -0.019         | 0.644                               | 0.709          | 0.576               | 0.484                       | 0.540                             | <b>0.889</b>        | 0.083            | 0.556             | 0.406          |
| Physical support                            | 0.137                                       | 0.118                          | 0.197                      | 0.174                       | 0.105                           | 0.208                                  | 0.093                     | 0.143          | 0.150                               | 0.187          | 0.102               | 0.116                       | 0.183                             | 0.189               | <b>0.525</b>     | 0.163             | 0.762          |
| Emotional support                           | 0.786                                       | 0.684                          | 0.647                      | 0.711                       | 0.551                           | 0.632                                  | 0.258                     | 0.009          | 0.651                               | 0.506          | 0.396               | 0.435                       | 0.481                             | 0.601               | 0.068            | <b>0.915</b>      | 0.376          |
