# Supplementary material for: Through the patients’ eyes - Psychometric evaluation of the 64-item version of the Experienced Patient-Centeredness Questionnaire (EPAT-64)
Source: bioRxiv or medRxiv preprint supplement (doi:10.1101/2024.03.28.24304955), 2024-07-31
Supplement: Supplementary file [file media-8.pdf]

## Appendix 8: Construct validity

**Article:** Through the patients' eyes - Psychometric evaluation of the Experienced Patient-Centeredness Questionnaire (EPAT-64)

**Authors:** Eva Christalle, Stefan Zeh, Hannah Führes, Alica Schellhorn, Pola Hahlweg, Jödis Zill, Martin Härter, Carsten Bokemeyer, Jürgen Gallinat, Christoffer Gebhardt, Christina Magnussen, Volkmar Müller, Katharina Schmalstieg-Bahr, André Strahl, Levente Kriston, Isabelle Scholl

Table 1: Construct validity: Correlations between model-based factor scores and health status as well as satisfaction

| Dimension                                   | Outpatients                |                           | Inpatients                 |                           |
|---------------------------------------------|----------------------------|---------------------------|----------------------------|---------------------------|
|                                             | Health status <sup>1</sup> | Satisfaction <sup>2</sup> | Health status <sup>1</sup> | Satisfaction <sup>2</sup> |
| <i>Hypothesis about correlations</i>        | <i>absolute &lt;0.3</i>    | <i>&gt;0.5</i>            | <i>absolute &lt;0.3</i>    | <i>&gt;0.5</i>            |
| Essential characteristics of the clinicians | -0.036                     | 0.335                     | -0.003                     | 0.172                     |
| Clinician-patient relationship              | -0.045                     | 0.299                     | 0.013                      | 0.129                     |
| Patient as a unique person                  | 0.008                      | 0.312                     | -0.014                     | 0.175                     |
| Biopsychosocial perspective                 | -0.002                     | 0.267                     | -0.024                     | 0.149                     |
| Clinician-patient communication             | -0.055                     | 0.224                     | 0.020                      | 0.083                     |
| Integration of medical and non-medical care | -0.016                     | 0.276                     | -0.065                     | 0.154                     |
| Teamwork and teambuilding                   | -0.058                     | 0.237                     | -0.108                     | 0.143                     |
| Access to care                              | -0.060                     | 0.198                     | -0.028                     | -0.007                    |
| Coordination and continuity of care         | -0.055                     | 0.339                     | -0.059                     | 0.193                     |
| Patient safety                              | -0.034                     | 0.320                     | -0.014                     | 0.176                     |
| Patient information                         | -0.052                     | 0.325                     | -0.076                     | 0.160                     |
| Patient involvement in care                 | -0.022                     | 0.264                     | -0.019                     | 0.152                     |
| Involvement of family and friends           | -0.060                     | 0.321                     | -0.044                     | 0.164                     |
| Patient empowerment                         | -0.040                     | 0.324                     | -0.057                     | 0.167                     |
| Physical support                            | -0.053                     | 0.251                     | -0.098                     | 0.038                     |
| Emotional support                           | -0.015                     | 0.230                     | -0.025                     | 0.137                     |
| General factor                              | -0.166                     | 0.728                     | -0.087                     | 0.833                     |

<sup>1</sup> General health status measured by first item of the German version of 12-Item Short Form Survey.<sup>32</sup>

<sup>2</sup> Treatment satisfaction measured by the German version of the 8-item Client Satisfaction Questionnaire (ZUF-8).<sup>33</sup>
